# Supplementary material
Source: publisher figshare collection journal article supplement (https://sage.figshare.com/ndownloader/files/20333403)
Supplement: Supplementary file 1 [file 20333403]

## Sheet: Figure 3
		GDP (Cumulative, bil 2014 US$)
Coverage of children under five years old				delta
100% coverage mid point		7.47715
Productivity loss with 2 episodes of childhood malaria -20% around 10%	Productivity loss with 2 episodes of childhood malaria +20% around 10%	7.2055	7.75078	0.545278
Mortality 10%	Mortality 30%	7.06135	7.90417	0.842818
Productivity loss with >3 episodes of childhood malaria -20% around 25%	Productivity loss with >3 episodes of childhood malaria +20% around 25%	6.95085	8.01252	1.06167
days absent from work to provide care -20% around 2	days absent from work to provide care +20% around 3	6.89716	8.05909	1.16193
Combination of s3 + s7	Combination s4+s8	6.37132	8.59494	2.22361
	Low	Base case	high
Productivity loss and days absent from work	20% and 1.6 days	25% and 2 days	30% and 2.4 days
Days absent from work to provide care	1.6	2	2.4
Productivity loss with >3 episodes during childhood	0.2	0.25	0.3
Vaccine efficacy against mortality	0.1	0.2	0.3
Productivity loss with at least 2 episodes	0.08	0.1	0.12

## Sheet: Figure 2
GDP per capita relative to baseline (% change)
			20% vaccine coverage	40% vaccine coverage	60% vaccine coverage	80% vaccine coverage	100% vaccine coverage
0	tot	2007	-7.66609e-13	-1.26454e-13	-1.94145e-12	-1.33449e-13	-1.38556e-13
1	tot	2008	0.00036336	0.000726461	0.00108952	0.00145229	0.00181492
2	tot	2009	0.000332414	0.000664393	0.000996395	0.00132809	0.00165945
3	tot	2010	0.000301929	0.000603622	0.000905334	0.00120641	0.0015075
4	tot	2011	0.000272994	0.000545751	0.000818126	0.00109025	0.00136189
5	tot	2012	0.000245144	0.000489749	0.000734096	0.000978009	0.00122151
6	tot	2013	0.000217863	0.00043535	0.000652534	0.000869037	0.00108515
7	tot	2014	0.000191571	0.000382553	0.00057316	0.000763275	0.000953055
8	tot	2015	0.00016592	0.000331114	0.000495917	0.000660299	0.000823994
9	tot	2016	0.000140892	0.000280971	0.000420611	0.000559774	0.000698198
10	tot	2017	0.000116134	0.000231806	0.000346839	0.000461323	0.000575211
11	tot	2018	9.21285e-05	0.000183746	0.000274763	0.000365029	0.0004548
12	tot	2019	0.000148123	0.000295661	0.000442677	0.000589126	0.000735049
13	tot	2020	0.000204359	0.000408091	0.000611339	0.000814032	0.00101643
14	tot	2021	0.000260971	0.000521348	0.0007813	0.00104071	0.00129969
15	tot	2022	0.000320921	0.00064136	0.000961328	0.00128085	0.00159994
16	tot	2023	0.000385292	0.000770057	0.00115445	0.00153822	0.00192173
17	tot	2024	0.000457373	0.000914548	0.00137152	0.00182821	0.00228456
18	tot	2025	0.000525813	0.00105139	0.00157699	0.00210242	0.0026278
19	tot	2026	0.000588627	0.00117722	0.00176582	0.00235442	0.00294293
20	tot	2027	0.000647272	0.00129462	0.00194181	0.00258916	0.00323646
21	tot	2028	0.000701807	0.00140334	0.00210487	0.00280632	0.00350773
22	tot	2029	0.000758374	0.00151698	0.00227553	0.00303411	0.00379267
23	tot	2030	0.000811941	0.00162392	0.00243597	0.00324809	0.00406036
24	tot	2031	0.000860795	0.00172165	0.0025826	0.00344347	0.00430453
25	tot	2032	0.0009064	0.00181278	0.00271909	0.00362522	0.00453144
26	tot	2033	0.000948147	0.00189614	0.00284385	0.00379141	0.00473884
27	tot	2034	0.000991381	0.00198255	0.00297346	0.00396423	0.00495477
28	tot	2035	0.00103038	0.00206047	0.00309026	0.00411985	0.00514909
29	tot	2036	0.00106376	0.00212739	0.00319029	0.00425309	0.00531541
30	tot	2037	0.00109337	0.00218613	0.00327841	0.00437003	0.00546115
31	tot	2038	0.00111915	0.00223763	0.00335512	0.00447203	0.00558802
32	tot	2039	0.00114739	0.00229384	0.00343944	0.00458413	0.00572789
33	tot	2040	0.00117372	0.00234654	0.0035182	0.00468901	0.0058587
34	tot	2041	0.00119823	0.00239545	0.0035913	0.00478598	0.00597947
35	tot	2042	0.00122232	0.00244329	0.00366278	0.00488084	0.00609752
36	tot	2043	0.00124611	0.00249043	0.0037332	0.00497435	0.00621385
37	tot	2044	0.00127333	0.00254487	0.0038147	0.00508267	0.00634891
38	tot	2045	0.00129949	0.00259711	0.00389286	0.00518658	0.00647844
39	tot	2046	0.00132381	0.00264554	0.00396504	0.00528259	0.00659792
40	tot	2047	0.00134725	0.00269218	0.00403492	0.00537529	0.0067135
41	tot	2048	0.0013704	0.0027382	0.00410363	0.00546653	0.00682691
42	tot	2049	0.00139776	0.00279302	0.00418557	0.0055756	0.00696304
43	tot	2050	0.0014265	0.00285031	0.00427127	0.00568951	0.00710506
44	tot	2051	0.00145563	0.00290854	0.00435831	0.0058054	0.00724954
45	tot	2052	0.00148603	0.002969	0.00444888	0.00592582	0.0073995
46	tot	2053	0.00151746	0.00303177	0.00454266	0.0060504	0.00755486
47	tot	2054	0.00155321	0.00310303	0.00464948	0.00619244	0.00773207
48	tot	2055	0.00158919	0.00317486	0.00475691	0.00633539	0.00791032
Richest 20/poorest 20 income relative to baseline (% change)
		scA1	scA2	scA3	scA4	scA5
	2007	-6.99441e-15	1.18572e-13	-6.32827e-15	1.86073e-13	4.84524e-12
	2008	6.67461e-05	0.000133489	0.000200224	0.000266955	0.000333676
	2009	4.31792e-05	8.62956e-05	0.000129579	0.000172764	0.00021592
	2010	7.78751e-06	1.56478e-05	2.33315e-05	3.14804e-05	3.93038e-05
	2011	-1.36631e-05	-2.74327e-05	-4.11696e-05	-5.43587e-05	-6.79855e-05
	2012	-1.12875e-05	-2.27448e-05	-3.38931e-05	-4.51638e-05	-5.62129e-05
	2013	-5.31198e-06	-1.05151e-05	-1.60731e-05	-2.11527e-05	-2.61837e-05
	2014	8.29682e-07	1.41504e-06	2.38176e-06	3.13049e-06	4.05915e-06
	2015	6.49644e-06	1.32358e-05	1.99364e-05	2.6654e-05	3.36397e-05
	2016	1.21908e-05	2.46003e-05	3.71304e-05	4.95424e-05	6.21748e-05
	2017	1.81038e-05	3.59007e-05	5.41702e-05	7.20759e-05	9.05496e-05
	2018	2.30083e-05	4.59824e-05	6.9268e-05	9.25258e-05	0.000115679
	2019	-4.72846e-05	-9.49285e-05	-0.000142414	-0.000189973	-0.00023781
	2020	-0.000121312	-0.000242748	-0.00036428	-0.000485815	-0.000607589
	2021	-0.000196039	-0.000392385	-0.000588902	-0.000785547	-0.00098219
	2022	-0.000283648	-0.000567382	-0.000851737	-0.00113579	-0.00141633
	2023	-0.000380052	-0.000760095	-0.00114031	-0.00152011	-0.00190048
	2024	-0.000511249	-0.00102267	-0.00153416	-0.00204565	-0.00255798
	2025	-0.000638942	-0.00127846	-0.00191775	-0.00255729	-0.00319721
	2026	-0.00074083	-0.00148139	-0.00222207	-0.00296268	-0.00370368
	2027	-0.000837607	-0.00167492	-0.00251175	-0.00334821	-0.00418472
	2028	-0.000931193	-0.00186152	-0.00279093	-0.00371985	-0.00464772
	2029	-0.00105087	-0.0021004	-0.00314899	-0.00419635	-0.00524382
	2030	-0.00134249	-0.00268262	-0.00402027	-0.00535574	-0.00668923
	2031	-0.00145447	-0.00290605	-0.00435459	-0.00580029	-0.00724313
	2032	-0.0015635	-0.00312332	-0.00467948	-0.00623158	-0.0077802
	2033	-0.00166948	-0.00333422	-0.00499425	-0.0066495	-0.00830023
	2034	-0.00180215	-0.00359863	-0.00538942	-0.00717423	-0.00895373
	2035	-0.00193125	-0.0038555	-0.00577283	-0.00768374	-0.00958773
	2036	-0.00203522	-0.0040628	-0.00608245	-0.00809432	-0.0100986
	2037	-0.00213526	-0.00426129	-0.00637835	-0.00848636	-0.0105855
	2038	-0.0022315	-0.00445296	-0.00666427	-0.00886518	-0.0110563
	2039	-0.00235158	-0.00469178	-0.00702047	-0.0093375	-0.0116436
	2040	-0.00247068	-0.00492836	-0.00737351	-0.00980573	-0.0122255
	2041	-0.00257087	-0.00512751	-0.0076699	-0.0101987	-0.0127135
	2042	-0.00266972	-0.00532428	-0.00796308	-0.0105867	-0.0131955
	2043	-0.00277009	-0.00552316	-0.00825949	-0.0109789	-0.0136821
	2044	-0.00289285	-0.00576696	-0.0086228	-0.0114605	-0.0142804
	2045	-0.00301541	-0.00601081	-0.00898611	-0.0119417	-0.0148778
	2046	-0.00312147	-0.00622133	-0.00929946	-0.0123567	-0.0153929
	2047	-0.0032263	-0.0064294	-0.00960925	-0.0127666	-0.0159015
	2048	-0.00333218	-0.00663952	-0.00992244	-0.0131807	-0.0164153
	2049	-0.00346117	-0.00689573	-0.0103039	-0.0136858	-0.0172865
	2050	-0.00422608	-0.00847499	-0.0126832	-0.0168519	-0.0209811
	2051	-0.00442862	-0.00881345	-0.0131553	-0.017455	-0.0217128
	2052	-0.00456943	-0.00909253	-0.0135698	-0.0180023	-0.0223904
	2053	-0.00471222	-0.00937512	-0.0139893	-0.0185561	-0.0230755
	2054	-0.00487558	-0.00969845	-0.0144693	-0.0191894	-0.0238594
	2055	-0.0050407	-0.0100254	-0.0149549	-0.0198299	-0.0246519
Annual average income per capita relative to baseline (% change)
			scA1	scA2	scA3	scA4	scA5
	Accra	aggaccra	0.000349625	0.000699489	0.00104941	0.00139944	0.00174983
	Coast	coast	0.000791762	0.0015837	0.00237595	0.00316843	0.00396103
	Forest	forest	0.00151307	0.0030265	0.00454036	0.00605459	0.00756909
	N.Savannah	north_sav	0.002177	0.00435188	0.00652453	0.00869508	0.0108634
	S.Savannah	south_sav	0.000544621	0.00108951	0.00163475	0.00218023	0.00272598
Annual average income per capita relative to baseline (by urbanity, % change)
			scA1	scA2	scA3	scA4	scA5
		accra	0.00035482	0.000710037	0.00106558	0.00142153	0.00177783
		curb	0.000766276	0.00153183	0.0022968	0.00306118	0.00382481
		crur	0.00103393	0.00206762	0.00310112	0.00413428	0.00516729
		furb	0.00268981	0.00537777	0.00806388	0.0107481	0.0134306
		frur	0.00129045	0.00257952	0.00386723	0.00515357	0.00643848
		snub	0.00166232	0.00332004	0.00497306	0.00662169	0.0082656
		snru	0.00104132	0.00207909	0.00311326	0.00414383	0.00517086
		ssub	0.000354226	0.000708209	0.00106208	0.00141568	0.00176918
		ssru	0.000785533	0.00157085	0.00235594	0.00314083	0.00392551
Remember: re-arrange the table to fit the labels. The order is different
			A1	A2	A3	A4	A5
Urban	Accra		0.00035482	0.000710037	0.00106558	0.00142153	0.00177783
	Coast		0.000766276	0.00153183	0.0022968	0.00306118	0.00382481
	Forest		0.00268981	0.00537777	0.00806388	0.0107481	0.0134306
	N.Sav		0.00166232	0.00332004	0.00497306	0.00662169	0.0082656
	S.Sav		0.000354226	0.000708209	0.00106208	0.00141568	0.00176918
Rural	Coast		0.00103393	0.00206762	0.00310112	0.00413428	0.00516729
	Forest		0.00129045	0.00257952	0.00386723	0.00515357	0.00643848
	N.Sav		0.00104132	0.00207909	0.00311326	0.00414383	0.00517086
	S.Sav		0.000785533	0.00157085	0.00235594	0.00314083	0.00392551
	A1	A2	A3	A4	A5
